# Supplementary material for: The Nature and Quality of Australian Supermarkets’ Policies That Can Impact Public Health Nutrition, and Evidence of Their Practical Application: A Cross-Sectional Study
Source: PubMed Central journal article supplement (PMC6520865; doi:10.3390/nu11040853), 2019-04-15
Supplement: nutrients-11-00853-s001.pdf [file nutrients-11-00853-s001.pdf]

Table S1: Supermarket own brands present on foods and non-alcoholic beverages in three Australian supermarkets

| Supermarket own brand present            | Frequency   | Percent |
|------------------------------------------|-------------|---------|
| <i>Coles own brands</i>                  |             |         |
| Coles                                    | 1482        | 85.6%   |
| The Bakery at Coles                      | 93          | 5.4%    |
| Coles Simply Gluten Free                 | 47          | 2.7%    |
| Coles Organic                            | 28          | 1.6%    |
| Coles Smart Buy                          | 22          | 1.3%    |
| Coles Finest                             | 14          | 0.8%    |
| Coles Grill                              | 12          | 0.7%    |
| Coles Simply                             | 11          | 0.6%    |
| Coles Make at Home                       | 8           | 0.5%    |
| Coles Bake at Home                       | 7           | 0.4%    |
| Coles Gluten Free                        | 4           | 0.2%    |
| Coles Simply Less                        | 3           | 0.2%    |
| <b>Total Coles audited products</b>      | <b>1731</b> |         |
| <i>Woolworths own brands</i>             |             |         |
| Woolworths Select                        | 631         | 34.8%   |
| Woolworths                               | 506         | 27.9%   |
| Woolworths Homebrand                     | 153         | 8.4%    |
| Macro Organic                            | 114         | 6.3%    |
| Macro                                    | 81          | 4.5%    |
| Woolworths in-store bakery label         | 80          | 4.4%    |
| Woolworths Essentials                    | 54          | 3.0%    |
| Woolworths Gold                          | 46          | 2.5%    |
| Woolworths Free From                     | 32          | 1.8%    |
| Woolworths Created with Jamie            | 15          | 0.8%    |
| Jamie Oliver                             | 14          | 0.8%    |
| Macro Free Range                         | 14          | 0.8%    |
| Baby Macro Organic                       | 12          | 0.7%    |
| Woolworths Market Value                  | 12          | 0.7%    |
| Woolworths Delicious Nutritious          | 10          | 0.6%    |
| Woolworths The Odd Bunch                 | 8           | 0.4%    |
| Woolworths Simply Roast                  | 7           | 0.4%    |
| Woolworths Select Once Upon a Time       | 6           | 0.3%    |
| Farmer's Own                             | 5           | 0.3%    |
| Mini Macro                               | 4           | 0.2%    |
| Woolworths Simply Heat                   | 4           | 0.2%    |
| Gold                                     | 1           | 0.1%    |
| Macro Grass Fed                          | 1           | 0.1%    |
| Woolworths Simply Cook                   | 1           | 0.1%    |
| Woolworths Simply Stir-fry               | 1           | 0.1%    |
| <b>Total Woolworths audited products</b> | <b>1812</b> |         |
| <i>IGA own brands</i>                    |             |         |
| Black & Gold                             | 273         | 68.8%   |
| SUPA IGA                                 | 49          | 12.3%   |
| IGA Baker's Oven                         | 38          | 9.6%    |
| IGA Signature                            | 24          | 6.0%    |
| Community Co                             | 12          | 3.0%    |
| IGA Signature AWARE                      | 1           | 0.3%    |
| <b>Total IGA audited products</b>        | <b>397</b>  |         |
| <b>Total audited products</b>            | <b>3940</b> |         |
